# Supplementary material
Source: PubMed Central journal article supplement (PMC5392745)
Supplement: 10.1194_M072140_jlr.M072140-1.pdf [file 10.1194_M072140_jlr.M072140-1.pdf]

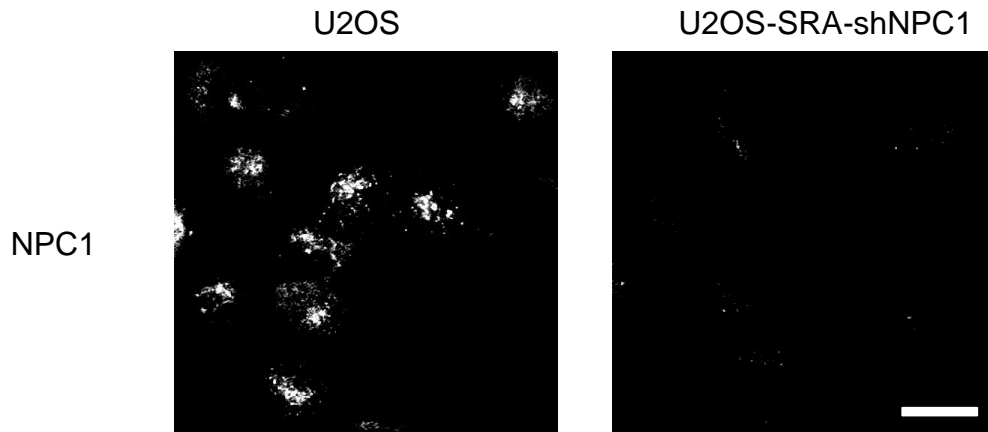

**Supplemental Figure S1. Testing specificity of rabbit polyclonal anti-hNPC1 antibody:** U2OS (WT) and U2OS-SRA-shNPC1 cells were plated in poly-D-lysine coated cover-slip bottom dishes. Two days after plating, cells were fixed with 2% PFA permeabilized and immunostained with a primary rabbit anti-NPC1 antibody and counter-stained with goat anti rabbit Alexa546 secondary antibody. Images were acquired on Zeiss LSM880 confocal microscope using a 63X objective. Images shown are sum projections. . Scale bar = 10  $\mu$ m.

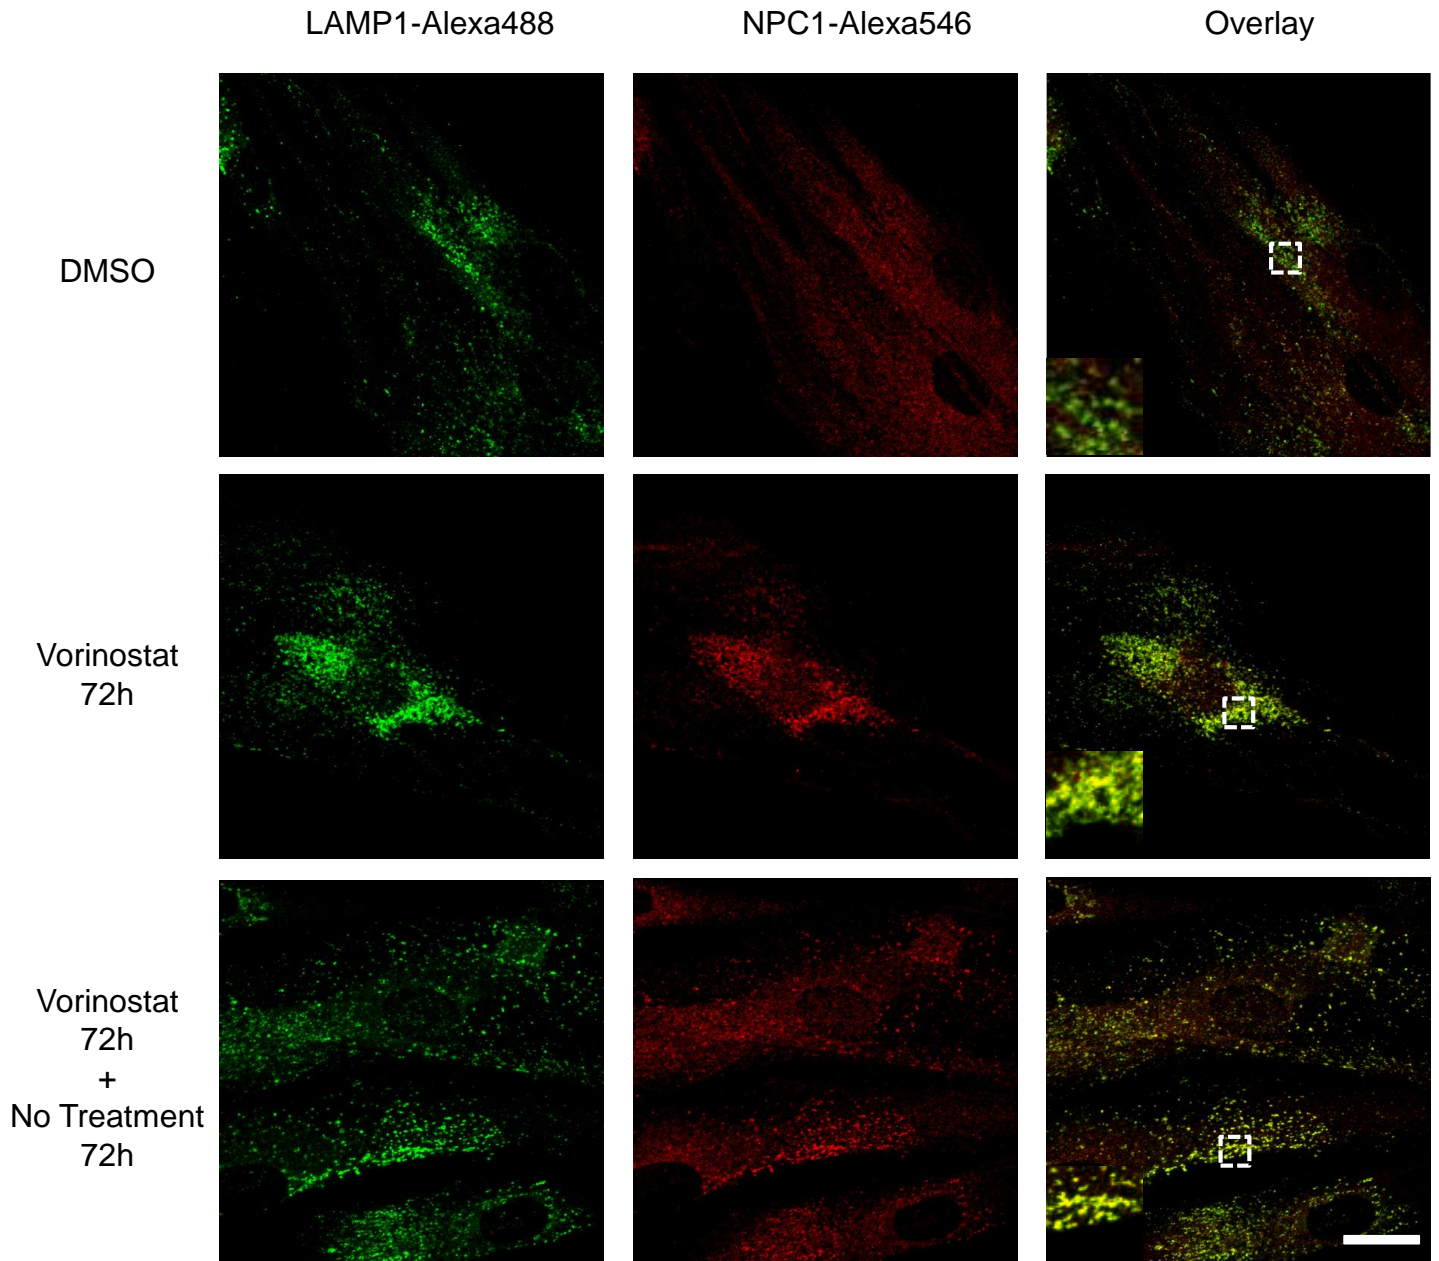

**Supplemental Figure S2: Co-localization of NPC1 with LAMP1 in NPC1 mutant fibroblasts.**

GM18453 cells were plated in poly-D-lysine coated cover-slip bottom dishes in MEM growth medium supplemented with 5.5% FBS. On day 2 cells were treated with DMSO or 10 $\mu$ M Vorinostat and incubated for 72 hours. After 72 hours, Vorinostat supplemented media was replaced with growth medium without Vorinostat and incubated for additional 72 hours. Cells were finally fixed with 2% PFA, permeabilized and immunostained for NPC1 (rabbit anti-hNPC1) followed by goat anti rabbit Alexa 546 and LAMP1 (rabbit anti-LAMP1) followed by goat anti rabbit Alexa 488 secondary antibody respectively. Images were acquired on Zeiss LSM880 confocal microscope using a 63X objective. Images shown are average projections. The region outlined in the Overlay images is shown at higher magnification in the inset. Scale bar = 10  $\mu$ m.

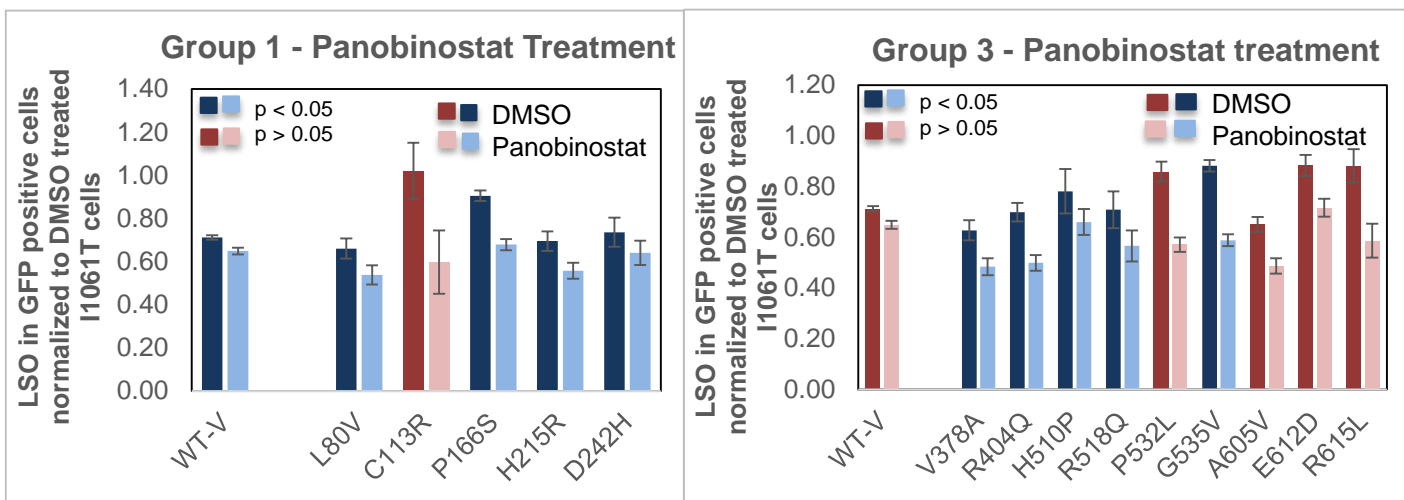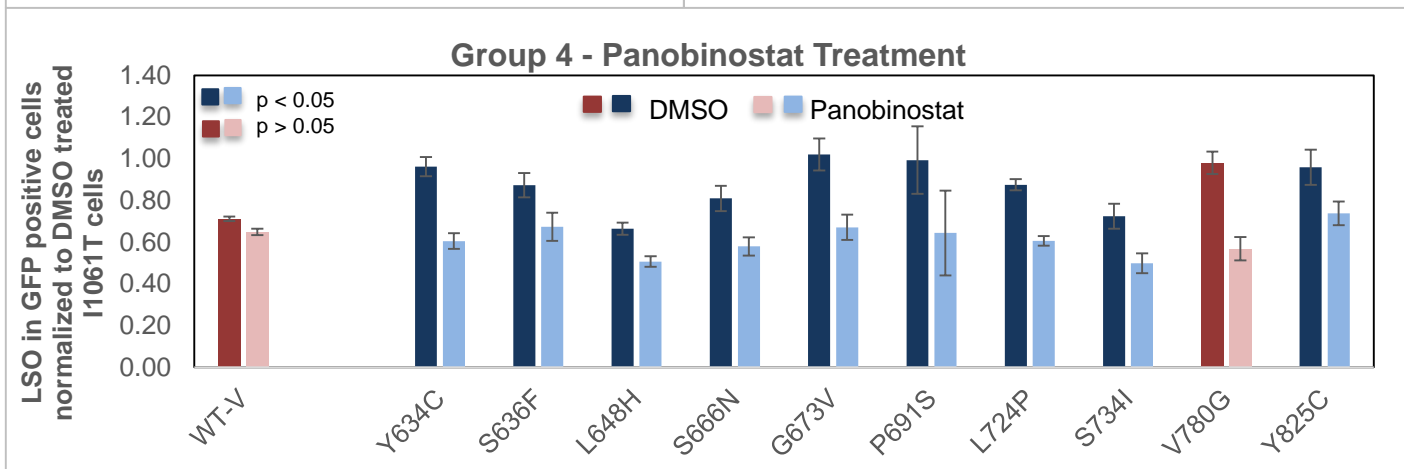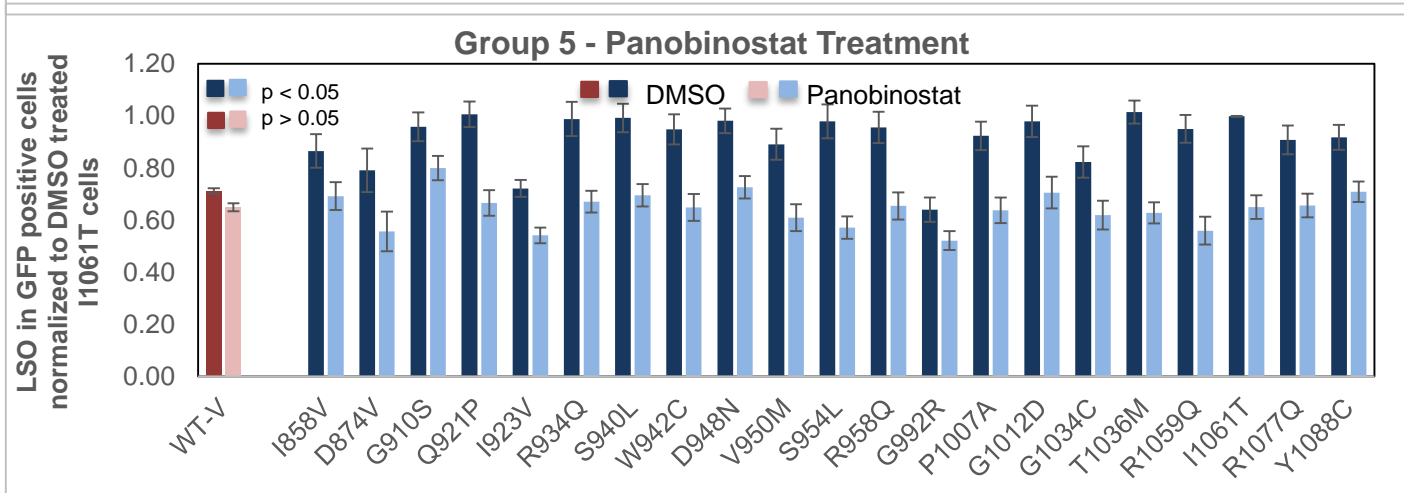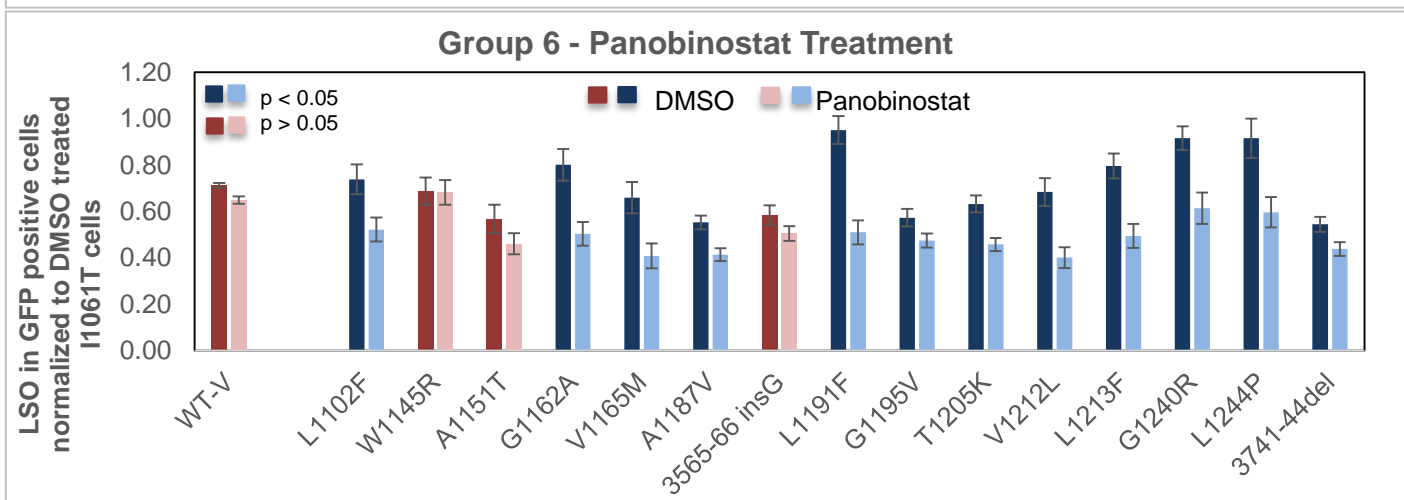

**Supplemental Figure S3. Quantification of effects of Panobinostat on cholesterol accumulation in NPC1 mutants.**

The effect of 50 nM Panobinostat was tested on 60 different NPC1 mutations from five segments of the NPC1 protein as illustrated in Figure 8. DMSO was used as a solvent control. Filipin fluorescence images of the transfected cells were analyzed to obtain an LSO value as explained in methods. Data represent averages  $\pm$  SEM from 15-25 images. Each image includes about 1-5 transfected cells. Dark blue (DMSO treated) and light blue bars (Panobinostat treated) for each group represent mutants that showed reduction in LSO values with  $p < 0.05$ , and dark red (DMSO treated) and pink bars (Panobinostat treated) represent mutants that showed no significant reduction in LSO value. Statistical significance was measured by t-test with two-tailed distribution and two-sample equal variance (homoscedastic) type using Microsoft Excel software.
