# Supplementary material
Source: PubMed Central journal article supplement (PMC5392745)
Supplement: 10.1194_M072140_jlr.M072140-2.pdf [file 10.1194_M072140_jlr.M072140-2.pdf]

SUPPLEMENTAL INFORMATION:

**Histone deacetylase inhibitors correct the cholesterol storage defect in most NPC1 mutant cells**

Nina H. Pipalia<sup>a</sup>, Kanagaraj Subramanian<sup>b</sup>, Shu Mao<sup>a</sup>, Harold Ralph<sup>a</sup>, Darren M. Hutt<sup>b</sup>,

Samantha M. Scott<sup>b</sup>, William E. Balch<sup>b</sup> and Frederick R. Maxfield<sup>a</sup>

<sup>a</sup>Department of Biochemistry, Weill Cornell Medical College, New York, NY 10065, USA

<sup>b</sup>Department of Chemical Physiology, and Cell and Molecular Biology. The Skaggs Institute for Chemical Biology, The Scripps Research Institute, La Jolla, California, 92037, USA

**Supplemental Table S1.**

| <b>p</b>          | <b>Vorinostat treatment</b>                                                                                                                                                                                                                                                                       | <b>Panobinostat treatment</b>                                                                                                                                                                               |
|-------------------|---------------------------------------------------------------------------------------------------------------------------------------------------------------------------------------------------------------------------------------------------------------------------------------------------|-------------------------------------------------------------------------------------------------------------------------------------------------------------------------------------------------------------|
| <b>&lt;0.001</b>  | P166S, H215R, P532L, G535V, A605V, E612D, R615L, Y634C, G673V, L724P, Y825C, I858V, G910S, Q921P, R934Q, S940L, W942C, V950M, S954L, R958Q, D948N, P1007A, G1012D, G1034C, T1036M, R1059Q, I1061T, R1077Q, Y1088C, L1102F, W1145R, G1162A, V1165M, L1191F, T1205K, V1212L, L1213F, G1240R, L1244P | P166S, R404Q, P532L, G535V, A605V, Y634C, L648H, G673V, L724P, V780G, Q921P, I923V, R934Q, S940L, W942C, D948N, V950M, S954L, R958Q, P1007A, T1036M, R1059Q, I1061T, L1191F, T1205K, V1212L, L1213F, G1240R |
| <b>0.001-0.01</b> | C113R, D242H, S636F, L648H, V780G, G992R, 3565-66 insG, 3741-44del                                                                                                                                                                                                                                | V378A, E612D, R615L, S666N, S734I, G1012D, R1077Q, Y1088C, G1162A, V1165M, A1187V, L1244P                                                                                                                   |
| <b>0.01-0.05</b>  | S734I, D874V, I923V, A1151T, G1195V                                                                                                                                                                                                                                                               | C113R, H215R, S636F, Y825C, I858V, D874V, G910S, G992R, L1102F, G1034C, G1195V, 3741-44del                                                                                                                  |
| <b>&gt;0.05</b>   | L80V, V378A, R404Q, H510P, R518Q, S666N, P691S, A1187V                                                                                                                                                                                                                                            | L80V, D242H, H510P, R518Q, P691S, W1145R, A1151T, 3565-66 insG                                                                                                                                              |

**Supplemental Table S1.**

The effects of 10  $\mu$ M Vorinostat or 50 nM Panobinostat were tested on 60 different NPC1 mutations. DMSO was used as a solvent control. Filipin fluorescence images of the transfected cells were analyzed to obtain an LSO value as illustrated in Figure 6. Data from 15-25 fields with ~1-5 transfected cells per field were obtained and an LSO value per field was obtained. Statistical significance was measured by t-test with two-tailed distribution and two-sample equal variance (homoscedastic) type using Microsoft Excel software. The responses of are grouped according to the statistical significance of the difference between HDACi-treated and solvent treated cells.
